# Supplementary material
Source: PubMed Central journal article supplement (PMC8094838)
Supplement: BPA-20-96-s001.pdf [file BPA-20-96-s001.pdf]

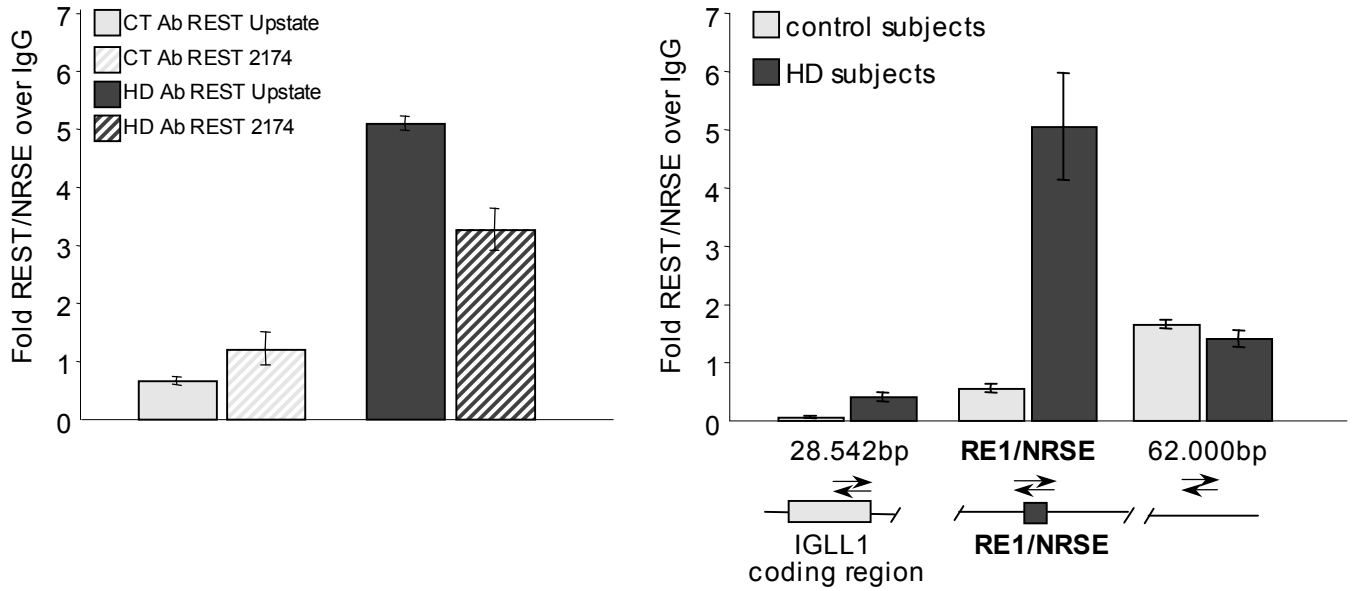

Supplementary Figure 3: **A)** ChIP at the RE1/NRSE of the IGLL1 locus using two different anti REST/NRSF antibodies. **B)** ChIP scanning was used to confirm the specificity of REST/NRSF enrichment at the IGLL1 locus.
