# Supplementary material
Source: PubMed Central journal article supplement (PMC8094838)
Supplement: BPA-20-96-s004.pdf [file BPA-20-96-s004.pdf]

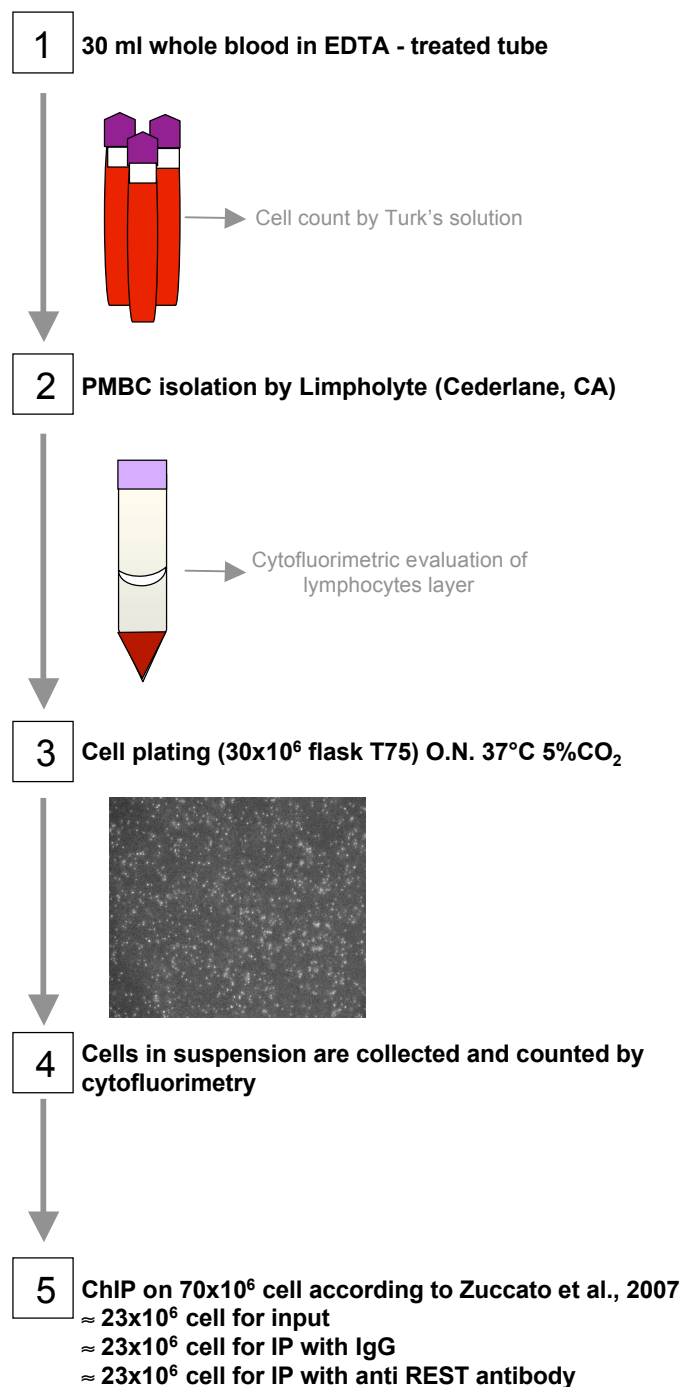

Supplementary figure 1: a schematic representation of the procedure to isolate fresh lymphocytes to be used in the REST ChIP assay.
